23 Address: BGI-Shenzhen, Beishan Industrial Zone, Shenzhen 518083, China.

24 E-mail: [zouyuanqiang@genomics.cn](mailto:zouyuanqiang@genomics.cn)

25

26 **Running title:** *Christensenella intestinihominis* sp. nov.

27 **Contents category:** New taxa - *Firmicutes* and related organisms

28

29 **Keywords:** *Christensenella*, *Christensenella intestinihominis* sp. nov., taxonomy, genome

30 sequencing, phylogenetic analysis, cholesterol-lowering

31

## 32 **Abstract**

33 **A Gram-staining-negative, non-spore-forming, short, straight rod, non-motile, obligate**

34 **anaerobic bacterial strain, AF73-05CM02<sup>T</sup>, was isolated from faecal sample of thirty-years**

35 **old healthy male. Colonies were approximately 0.2mm in diameter, beige and circular after 4**

36 **days of incubation on PYG agar under anaerobic conditions at 37°C. Strain AF73-05CM02<sup>T</sup>**

37 **grew in a temperature range between 30-42°C and pH range from 6.0 to 8.5, with optimum**

38 **growth at 37-42°C and pH 7.0. Base on the 16S rRNA gene sequence analysis, strain**

39 **AF73-05CM02<sup>T</sup> belongs to the genus *Christensenella* and showed the highest level of**

40 **sequence similarity with *Christensenella minuta* YIT 12065<sup>T</sup>. The predominant fatty acids of**

41 **strain AF73-05CM02<sup>T</sup> were C<sub>10:0</sub> (7.5%), iso-C<sub>11:0</sub> (5.6%), C<sub>12:0</sub> (7.2%), C<sub>14:0</sub> (46.6%),**

42 **iso-C<sub>15:0</sub> (7.4%), C<sub>16:0</sub> (9.7%) and C<sub>18:1 ω9c</sub> (6.9%). Acetic acid, formic acid, butyric acid and**

43 **lactic acid were end products of glucose fermentation. The isolate was negative for catalase,**

44 **indole production and hydrolysis of gelatin. Genomic relatedness analyses based on average**

45 nucleotide identity indicated strain AF73-05CM02<sup>T</sup> significantly differed from other species  
46 of the genus *Christensenella*, showing ANI values under 82.89% with the phylogenetically  
47 closest species. The G+C content of the genomic DNA was 52.07 mol% from genome  
48 sequence, which differs from that of *Christensenella minuta*. Several physiological  
49 biochemical and genotypic properties differentiated the novel bacterial strain from the  
50 related species, indicating that the isolate represent a new species of the genus  
51 *Christensenella* for which the name *Christensenella intestinhominis* sp. nov. is proposed, with  
52 strain AF73-05CM02<sup>T</sup> (=CGMCC 1.5207<sup>T</sup> =DSM 103477<sup>T</sup>) being the type strain. The follow  
53 study approached the function of cholesterol-lowering for strains AF73-05CM02<sup>T</sup> and DSM  
54 22067<sup>T</sup> revealed the two strains exhibit capacity for removing cholesterol with efficiency of  
55 36.6% and 54.3%. Exopolysaccharide production of two strains were 234 and 271 mg/L,  
56 respectively.

57

## 58 Introduction

59 The human gut is colonised by a large and complex community of microorganisms ranging from  
60 10<sup>13</sup> to 10<sup>14</sup> microbial cells (Ventura, 2009; Ghosh, 2013), which is equivalent to 10 times the  
61 number of human cells (Bäckhed F, 2005; Jeffery et al., 2016). The microbiome begin to resident  
62 the intestinal tract shortly after birth and develops over the first few years (Palmer et al., 2007).  
63 The composition of the microbiota is affected by many factors, including the genetic background  
64 of the host (Khachatryan et al., 2008; Benson et al., 2010; Fan et al., 2020), the host immune status  
65 (Hooper et al., 2012), living condition and daily diet (Turnbaugh et al., 2009; Fujimura et al.,  
66 2010). Approximately 90% of gut microbiota were affiliated with the two bacterial phyla,

67 including *Firmicutes* and *Bacteroidetes* (Turnbaugh et al., 2006; Turnbaugh et al., 2008;  
68 Tremaroli and Backhed, 2012). *Christensenella minuta* YIT 12065<sup>T</sup>, the type species of genus  
69 *Christensenella* within the family *Christensenellaceae*, isolated from human faeces, was first  
70 proposed by Morotomi, *et al* (Morotomi et al., 2012). Phylogenetically the isolate formed a novel  
71 family-level lineage within the order *Clostridiales* with 86.9–86.1% 16S rRNA gene sequence  
72 similarity with the closest relatives. *C. minuta* YIT 12065<sup>T</sup> was identified as Gram-negative,  
73 non-motile, non-spore-forming, short, straight rod with tapered ends and grows anaerobically. The  
74 major fatty acids are iso-C<sub>15:0</sub>, C<sub>14:0</sub> and C<sub>16:0</sub>. LL-diaminopimelic acid is present in the cell wall.  
75 The draft genome of *C. minuta* YIT 12065<sup>T</sup> has been reported previously (Rosa et al., 2017; Coil  
76 et al., 2020).The recent research found that strain *C. minuta* as a beneficial bacteria has a  
77 significantly effect in protecting against obesity (Goodrich et al., 2014), which might be a novel  
78 approach in the treatment of obesity.

79 Cholesterol is an important basic substance for human body. However, a elevated level of blood  
80 cholesterol increases the risk of cardiovascular diseases (CVDs) (Tok and Aslim, 2010; Tsai et al.,  
81 2014), which remain the leading cause of deaths worldwide (Ishimwe et al., 2015). In recent years,  
82 probiotics have been developed as a non-drug therapy to reduce blood lipids and cholesterol levels  
83 and the risk of CVDs (Pan et al., 2010; Tsai et al., 2014). The mechanisms of cholesterol-lowering  
84 was proposed for several hypotheses, including deconjugation of bile by bile salt hydrolase  
85 activity (Lye et al., 2010a), assimilation and conversion of cholesterol by probiotics (Gilliland et  
86 al., 1985; Lye et al., 2010b), and modulating the cholesterol absorption in the intestines of the host  
87 (Huang and Zheng, 2010; Yoon et al., 2013).

88 In the present study, we focus on the polyphasic taxonomic approach for a novel strain, *C.*

89 *intestinihominis* sp. nov. AF73-05CM02<sup>T</sup>, along with the whole genome sequencing and  
90 annotation data, and investigating its cholesterol-lowering property.

91

## 92 **Materials and Method**

### 93 **Strain isolation**

94 During study the composition of human gut microbiota and construct its taxonomic position by  
95 using a polyphasic approach based on phenotypic characteristics and genotypic properties, we  
96 isolated a novel *Christensenella*-like stain, designated AF73-05CM02<sup>T</sup>. The fresh faecal sample  
97 was collected from a healthy adult residing in Shenzhen, China, and brought back to the lab use  
98 for bacteria isolation, The specific location of the studies (GPS coordinates) was 37°35'37"N  
99 114°15'32"E. For cultivation, approximately 1 g fresh faecal was transferred into anaerobic box  
100 (Bactron Anaerobic Chamber, Bactron□-2, shellab, USA) with a gas phase of N<sub>2</sub>/H<sub>2</sub>/CO<sub>2</sub> (90 : 5 :  
101 5, v/v) and dispersed in 0.1 M PBS (pH 7.0). This suspension containing bacteria was mixed  
102 thoroughly and serially diluted and spread onto peptone-yeast extract-glucose (PYG) plates as  
103 described previously (Zou et al., 2019) . The plate was incubated at 37 °C for 1 week under  
104 anaerobic condition. Single colonies were picked and purified by inoculation and subculturing on  
105 the same medium. In this study, one of these strains, designated AF73-05CM02<sup>T</sup> was maintained  
106 as a glycerol suspension (20%, w/v) at -80°C. The type strain of genus *Christensenella*, *C. minuta*  
107 DSM 22607<sup>T</sup>, procured from the Deutsche Sammlung von Mikroorganismen und Zellkulturen  
108 (DSMZ), Braunschweig, Germany, was used as reference strain for phenotypic characterization,  
109 genomic comparison and analyses of cell fatty acids and maintained under the same conditions.

### 110 **16S rRNA gene sequencing and phylogenetic analysis**

111 The genomic DNA of strain AF73-05CM02<sup>T</sup> was prepared from cells harvested from PYG broth  
112 using the phenol:chloroform method (Cheng and Jiang, 2006). The 16S rRNA gene was amplified  
113 using the universal bacterial primers 27F-1492R (5'-AGAGTTTGATCATGGCTCAG-3' and  
114 5'-TAGGGTTACCTTGTTACGACTT-3') and purified as described by Zou *et al.* (Zou *et al.*,  
115 2013). Sequencing was performed by BGI-Shenzhen (Shenzhen, China). The resulting sequence  
116 was compared with sequences of type strains retrieved from the EzBioCloud server (Yoon *et al.*,  
117 2017) (<https://www.ezbiocloud.net/>) using BLAST. Phylogenetic analysis was performed using  
118 software package MEGA 7.0 (Tamura *et al.*, 2011) after multiple alignment of sequences data by  
119 using CLUSTAL W program (Thompson *et al.*, 1994). Evolutionary phylogenetic trees were  
120 constructed using the neighbour-joining method (Saitou and Nei, 1987), maximum-likelihood  
121 (Felsenstein, 1981) method and minimum-evolution method (Rzhetsky and Nei, 1993) and  
122 bootstrap values were calculated based on 1000 replications.

### 123 **Genome sequencing, GC content and genome comparison**

124 For genome comparison of the novel isolate and the closely related species, we conducted genome  
125 sequencing and assembly of strain AF73-05CM02<sup>T</sup>. DNA extraction and purity were described  
126 above. The draft genome sequence was carried out using a paired-end sequencing strategy with  
127 Ion Proton Technology (Life Technologies) at BGI-Shenzhen (Shenzhen, China). The paired-end  
128 library had an mean insert size of 500 bp. Reads were assembled using the SOAPdenovo 2  
129 package (Luo *et al.*, 2012). The genomic DNA base content (mol% G+C) was directly calculated  
130 from the draft genome data. To determine the DNA relatedness between the isolate and most  
131 closely related species, *C. minuta* DSM 22607<sup>T</sup> and *C. hongkongensis* HKU16<sup>T</sup> (Lau *et al.*, 2007;  
132 Lau *et al.*, 2015), we calculated the average nucleotide identity values (Damodharan *et al.*), which

133 was thought to be able to corresponds to DNA–DNA hybridization (Goris et al., 2007; Tindall et  
134 al., 2010), as described by Kim *et al.* (Kim et al., 2014), following the BLAST-based ANI  
135 calculation using the EzGenome web service. ANI values of 95–96% corresponding to 70% DDH  
136 has been proposed as a threshold value for species delineation in bacterial taxonomy. The obtained  
137 draft genome sequences were annotated using the Rapid Annotation Subsystem Technology  
138 (RAST) server (Kanehisa et al., 2016) and KEGG (Aziz et al., 2008) and COG databases  
139 (Galperin et al., 2015). A visual genomic comparison across strain AF73-05CM02<sup>T</sup> and most  
140 closely related species was generated with CGView server (Grant and Stothard, 2008)  
141 ([http://stothard.afns.ualberta.ca/cgview\\_server/index.html](http://stothard.afns.ualberta.ca/cgview_server/index.html)).

## 142 **Morphological and growth characteristics**

143 Morphological and cultural characteristics were investigated with strain AF73-05CM02<sup>T</sup>  
144 incubated in PYG medium at 37°C. Morphological observations were examined using both phase  
145 contrast microscopy (Olympus BX51, Japan) and transmission electron microscopy (TEM,  
146 HITACHI-8100). The Gram reaction, spore formation and presence of flagella were performed by  
147 staining using Gram stain kit (Solarbio), spore stain kit (Solarbio) and flagella stain kit (Solarbio)  
148 according to the manufacturer’s instructions. Cell motility was examined using semisolid PYG  
149 ( 0.4% agar) (Tittsler RP, 1936). Colony morphology was observed for cultures grown on PYG  
150 agar for 4 days at 37°C. Growth at 4, 10, 20, 25, 30, 35, 37, 45 and 50°C was tested on PYG  
151 medium to determine the optimal temperature and temperature range for growth. The pH range for  
152 growth was evaluated at pH 3.0–10.0 (at interval of 0.5 pH units) by adjusting the pH using the  
153 appropriate buffers as described by Sorokin (Sorokin, 2005). Tolerance to NaCl was determined in  
154 PYG broth containing different concentrations of NaCl (0-6%, in increments of 1.0%). Bilt

155 tolerance was also measured at different bile salt concentrations (0-5%, in increments of 1.0%) in  
156 the PYG broth contained all of the ingredients. All the growth tests of incubation under anaerobic  
157 condition for 2 weeks was determined by measuring the OD<sub>600</sub>.

## 158 **Physiological and biochemical characteristic**

159 For physiological and biochemical analyse, enzyme activities, hydrolytic activities, utilization of  
160 various substrates as sole carbon sources and acid production from different carbohydrates, were  
161 carried out for strain AF73-05CM02<sup>T</sup> comparison with the closely related species, *C. minuta* DSM  
162 22607<sup>T</sup>, using API ZYM, API 20A and API 50CHL systems (bioMérieux, Marcy l'Etoile, France).  
163 Sample preparation and test were performed following the directions of the manufacturer's  
164 instructions with incubation at 37°C in an anaerobic condition. For API 50CHL test, CHL broth  
165 was supplied with 0.05% cysteine hydrochloride for cells suspension and incubation. Catalase  
166 activity was assessed by 3% H<sub>2</sub>O<sub>2</sub> solution using cells collected from colonies incubated on PYG  
167 agar at 37°C for 5 days (Smibert RM, 1994). The isolate and reference type strain were tested  
168 under same laboratory conditions.

## 169 **Chemotaxonomical characteristic**

170 Chemotaxonomic characteristics of strain AF73-05CM02<sup>T</sup> and the reference strain were  
171 performed by detection of cellular fatty acids and cell wall composition. Strains were cultured on  
172 PYG plates at 37°C for 5 days under anaerobic conditions and the fatty acid methyl esters  
173 (FAMES) profile was prepared from lyophilized cells grown in PYG medium by extraction and  
174 methylation as described previously (Chen and Dong, 2004). Determination of the fatty acid was  
175 analysed by an Agilent HP6890 gas chromatograph and identified using MIDI microbial  
176 identification system (M, 1990) and carried out by CGMCC (China General Microbiological



177 Culture Collection Center, Beijing, China). The cell-wall peptidoglycan of strain AF73-05CM02<sup>T</sup>  
178 was performed using wet cell biomass (incubated at 37°C for 5 days on PYG plates) and the  
179 amino acid contents in peptidoglycan were determined by TLC as described by Zou, *et al.* (Zou et  
180 al., 2013).

## 181 **Susceptibility tests and Hemolytic activity**

182 Susceptibility to antibiotics of strain AF73-05CM02<sup>T</sup> was analysed by the disc diffusion method  
183 according to Nizami *et al* (Duran et al., 2012). Antibiotic discs (HANG WEI<sup>TM</sup>, China) were  
184 placed on PYG agar plates inoculated with prepared suspensions of the test organisms. The  
185 diameter of each zone was measured in millimeters after incubated at 37°C for 5 days. The  
186 following antibiotic discs were tested: penicillin (10 ug), ampicillin (10 ug), carbenicillin (100 ug),  
187 vancomycin (30), oxacillin (1 ug), piperacillin (100 ug), polymyxin B (300IU), compound  
188 sulfamethoxazole (25), furazolidone (300), chloroamphenicol (30) and clindamycin (2).  
189 Hemolytic activity was determined in sheep blood agar plates (Guangdong Huankai Microbial  
190 Sci&Tech.Co., Ltd.). The plates were incubated under anaerobic conditions for 5 days at 37°C and  
191 checked for hemolysis (Pineiro and Stanton, 2007).

## 192 **Metabolic end products analysis**

193 The metabolic end products of glucose fermentation, including short-chain fatty acids (SCFAs)  
194 and organic acids, were performed using gas chromatograph (GC-7890B, Agilent) equipped with  
195 capillary columns and detected using a flame-ionization detector (FID). The capillary column was  
196 packed with Agilent 19091N-133HP-INNOWax porapak HP-INNOWax (30m × 0.25mm ×  
197 0.25um) for SCFAs detection and Agilent 122-5532G DB-5ms (40m × 0.25mm × 0.25um) for  
198 organic acids. The metabolic end products of strain AF73-05CM02<sup>T</sup> were compared with the

199 closely related species of the genus *Christensenella*.

## 200 **The property of Exopolysaccharide (EPS) production**

201 The functional properties of strains AF73-05CM02<sup>T</sup> and *C. minuta* DSM 22607<sup>T</sup> were determined  
202 by investigating the production of exopolysaccharide (EPS). The EPS were isolated from  
203 fermentation solution of two strains using the method as described previously (Mercan et al.,  
204 2015). Strains were inoculated in PYG broth at 37°C for 3 days and the cultures were boiled at  
205 100°C for 15 min. The bacterial supernatant was collected after centrifugation at 10,000g for 30  
206 min at 4°C and treated with 80% trichloroacetic acid solution and stirring overnight for  
207 precipitating protein. Sample was centrifuged at 10,000g for 30 min at 4°C. The pH of the  
208 supernatant was adjusted to 7.0 with 2 M NaOH. The supernatant was then precipitated by adding  
209 double-volume chilled ethanol overnight and resuspended in distilled water with gentle heating.  
210 EPS was dialyze by 3000 Da dialysis membrane for 24 h at 4°C and washed twice by distilled  
211 water. The total EPS production levels was using phenol–sulfuric acid method with glucose as  
212 standard (50-500 mg/L) (Dubois, 1956).

## 213 **Determination of cholesterol-lowering activity**

214 The capability of strain AF73-05CM02<sup>T</sup> and the closely related reference strain *C. minuta* DSM  
215 22607<sup>T</sup> to lower cholesterol was determined according to a modified method of Damodharan *et al*  
216 (Damodharan et al., 2015). PYG-CHO broth was prepared with addition of 0.1% (w/v) bile, 0.2%  
217 (w/v) sodium thioglycollate and cholesterol dissolved in ethanol at a final concentration of  
218 approximately 100µg/ml, w/v. The bacterial culture inoculated with log phase was incubated  
219 anaerobically in PYG-CHO at 37°C for 4 days. After incubation, cells were harvested by  
220 centrifugation at 10000 × g at 4°C for 10min. The concentration of cholesterol in the supernatant

221 was measured using the o-phthalaldehyde method as described by Rudel and Morris (Rudel,  
222 1973).

223 Cholesterol-lowering activity from PYG-CHO of each strain broth was calculated in terms of  
224 percent cholesterol-lowering as follows:

$$225 \quad A=(B-C)/B*100\%$$

226  $A$ =% of cholesterol-lowering,  $B$ = the concentration of cholesterol in the PYG-CHO,  $C$ = the  
227 concentration of cholesterol in the supernatant after inoculated with bacteria for 4 days.

228

## 229 **Results and Discussion**

### 230 **Phylogeny based on 16S rRNA gene sequences**

231 The nearly complete 16S rRNA gene sequence of strain AF73-05CM02<sup>T</sup> (1,366 bp) was obtained.

232 The closest relatives of the isolate were *C. minuta* DSM 22607<sup>T</sup>, *Catabacter hongkongensis*

233 HKU16<sup>T</sup> (Lau et al., 2007), *Christensenella massiliensis* Marseille-P2438<sup>T</sup> (Ndongo et al., 2016b)

234 and *Christensenella timonensis* Marseille-P2437<sup>T</sup> (Ndongo et al., 2016a) with similarity value of

235 98.68%, 97.22%, 96.93% and 96.78%, respectively (**Table 1**). Phylogenetic analysis based on the

236 neighbour-joining, maximum-likelihood and minimum-evolution algorithm confirmed that strain

237 AF73-05CM02<sup>T</sup> is most closely related to *C. minuta* DSM 22607<sup>T</sup> and formed a tight phylogenetic

238 cluster with 99% bootstrap support (**Figure 1, Supplementary Figure S1 and S2**).

239

240 **Table 1. Levels of 16S rRNA gene sequence similarity and ANI values (in percentages) based**

241 **on BLAST for strain AF73-05CM02<sup>T</sup> and the phylogenetically related species.**

242 Taxa:1, AF73-05CM02<sup>T</sup>; 2, *C. minuta* DSM 22607<sup>T</sup>; 3, *C. hongkongensis* HKU16<sup>T</sup>; 4, *C.*

243 *massiliensis* Marseille-P2438<sup>T</sup>; 5, *C. timonensis* Marseille-P2437<sup>T</sup>.

| Strain                                              | Accession no. | 1     | 2*    | 3*    | 4*    | 5*  |
|-----------------------------------------------------|---------------|-------|-------|-------|-------|-----|
| <b>16S rRNA gene sequence similarity (%)</b>        |               |       |       |       |       |     |
| AF73-05CM02 <sup>T</sup>                            | KX078376      | 100   |       |       |       |     |
| <i>C. minuta</i> DSM 22607 <sup>T</sup>             | AB490809      | 98.68 | 100   |       |       |     |
| <i>C. hongkongensis</i> HKU16 <sup>T</sup>          | AB671763      | 97.22 | 96.69 | 100   |       |     |
| <i>C. massiliensis</i> Marseille-P2438 <sup>T</sup> | LT161898      | 96.93 | 97.51 | 95.99 | 100   |     |
| <i>C. timonensis</i> Marseille-P2437 <sup>T</sup>   | LT223568      | 96.78 | 97.38 | 96.79 | 95.40 | 100 |
| <b>ANI values (%)</b>                               |               |       |       |       |       |     |
| AF73-05CM02 <sup>T</sup>                            | MAIQ00000000  | 100   |       |       |       |     |
| <i>C. minuta</i> DSM 22607 <sup>T</sup>             | NZ_CP029256   | 83.31 | 100   |       |       |     |
| <i>C. hongkongensis</i> HKU16 <sup>T</sup>          | LAYJ00000000  | 73.84 | 75.39 | 100   |       |     |
| <i>C. massiliensis</i> Marseille-P2438 <sup>T</sup> | LT700187      | 78.00 | 78.01 | 73.28 | 100   |     |
| <i>C. timonensis</i> Marseille-P2437 <sup>T</sup>   | FLKP00000000  | 74.06 | 74.56 | 74.53 | 73.59 | 100 |

244 \* Data from NCBI and EzBioCloud.

245

## 246 **Genome properties**

247 The chromosomes of strain AF73-05CM02<sup>T</sup> was assembled from 3,145,728 reads resulting a total  
248 length of 3,026,655 bp in size and comprised 29 scaffolds including 36 contigs. The G+C content  
249 of DNA for strain AF73-05CM02<sup>T</sup> is 52.07 mol% as calculated from the whole-genome sequence.

250 Circular maps of strain AF73-05CM02<sup>T</sup> in comparison to related species is shown in **Figure 2**.

251 The general features of strain AF73-05CM02<sup>T</sup> and related species are summarized in **Table 2**.

252

253 **Table 2. Genome features of *C. intestinihominis* AF73-05CM02<sup>T</sup> and comparison with closely**

254 **related species**

| Features                            | 1         | 2         | 3         | 4         | 5         |
|-------------------------------------|-----------|-----------|-----------|-----------|-----------|
| <b>Approximate Genome Size (bp)</b> | 3,026,655 | 2,969,292 | 3,151,949 | 2,560,186 | 2,650,850 |
| <b>G+C content (mol%)</b>           | 52.07     | 51.4      | 48.5      | 50.4      | 51.7      |
| <b>DNA scaffolds</b>                | 29        | 1         | 38        | 1         | 2         |
| <b>N50 Length</b>                   | 294,532   | 2,969,292 | 166,940   | 2,560,186 | 2,314,156 |
| <b>Genes total number</b>           | 2,642     | 2,875     | 2,986     | 2,515     | 2,483     |
| <b>rRNAs (5S, 16S, 23S)</b>         | 4         | 6         | 3         | 8         | 9         |
| <b>tRNAs</b>                        | 47        | 49        | 47        | 51        | 51        |
| <b>ncRNA</b>                        | 4         | 8         | 4         | 4         | 4         |
| <b>Genes assigned to COGs</b>       | 2,176     | ND        | ND        | ND        | ND        |

255 Taxa:1, AF73-05CM02<sup>T</sup>; 2, *C. minuta* DSM 22607<sup>T</sup>; 3, *C. hongkongensis* HKU16<sup>T</sup>; 4, *C. massiliensis*

256 Marseille-P2438<sup>T</sup>; 5, *C. timonensis* Marseille-P2437<sup>T</sup>. ND, not data available

257

258 Among the 2,642 annotated genes in the *C. intestinihominis* AF73-05CM02<sup>T</sup> genome, 2,176 genes

259 with specific functions were assigned to COGs. The distribution of genes into COGs functional

260 classification was presented in **Figure 3** and **Supplementary Table S1**, revealed that E (Amino

261 acid transport and metabolism), G (Carbohydrate transport and metabolism), M (Cell

262 wall/membrane/envelope biogenesis), C (Energy production and conversion), R (General function

263 prediction only), T (Signal transduction mechanisms), K (Transcription) and J (Translation,

264 ribosomal structure and biogenesis) were abundant categories. For compared the Individual

265 predicted coding sequences of strain AF73-05CM02<sup>T</sup> with *C. minuta* DSM 22607<sup>T</sup> by RAST  
266 annotation, we found there were 10-11 RAST-annotated genes associated with diaminopimelic  
267 acid synthesis, 31-37 genes associated with metabolism of polar lipids, 14-16 genes associated  
268 with metabolism of polyamines, 4-5 genes associated with teichoic and lipoteichoic acids  
269 biosynthesis, and 3 genes associated with lipopolysaccharides biosynthesis present in the genomes  
270 (Table 3 and Supplementary Table S2). The number and kind of genes associated with  
271 diaminopimelic acid, polar lipids, polyamines and teichoic and lipoteichoic acids biosynthesis  
272 make strain AF73-05CM02<sup>T</sup> distinguishable from the reference species, *C. minuta* DSM 22607<sup>T</sup>.

273

274 **Table 3. Number of genes associated with biosynthetic pathway from whole genome**  
275 **sequences of strain AF73-05CM02<sup>T</sup> and *C. minuta* DSM 22607<sup>T</sup> identified by RAST.**

276 Numbers of genes identified for mycolic acids and quinines (benzoquinones and naphthoquinones)  
277 were zero for all taxa studied.

| Genes responsible for biosynthesis | AF73-05CM02 <sup>T</sup> | <i>C. minuta</i> DSM 22607 <sup>T</sup> |
|------------------------------------|--------------------------|-----------------------------------------|
| Diaminopimelic acid                | 10                       | 11                                      |
| Polar lipids                       | 31                       | 37                                      |
| Polyamines                         | 14                       | 16                                      |
| Teichoic and lipoteichoic acids    | 4                        | 5                                       |
| Lipopolysaccharides                | 3                        | 3                                       |

278

279 In order to further distinguish strain AF73-05CM02<sup>T</sup> from the phylogenetically related species, the  
280 genome comparison was determined using BLAST average nucleotide identities (ANIb). The ANI  
281 values between strain AF73-05CM02<sup>T</sup> and related reference species, *C. minuta* DSM 22607<sup>T</sup>, *C.*

282 *hongkongensis* HKU16<sup>T</sup>, *C. massiliensis* Marseille-P2438<sup>T</sup> and *C. timonensis* Marseille-P2437<sup>T</sup>  
283 were calculated as 83.51%, 78.92%, 79.66% and 78.76%, respectively (**Table 1**). The ANI values  
284 of strain AF73-05CM02<sup>T</sup> with the related species were significantly below the cutoff of 95–96%,  
285 which is proposed as a threshold value for species delineation in bacterial taxonomy (Goris et al.,  
286 2007), indicating that strain AF73-05CM02<sup>T</sup> is a distinct genomic species and should be classified  
287 as a representative of a novel species.

288

## 289 **Phenotypic features**

290 Strain AF73-05CM02<sup>T</sup> was an obligate anaerobic and Gram-stain-negative bacterium. Cells were  
291 approximately 0.5µm in width and 1.0–2.0µm in length and occurring singly or in short chains.  
292 Under phase contrast microscope, cells were non-spore-forming, flagella were not observed. The  
293 bacteria formed punctiform colonies (approximately 0.2mm in diameter) with circular and beige  
294 after 4 days of growth at 37°C on PYG agar under anaerobic conditions. The growth temperature  
295 was from 30–42°C, with the optimum around 37–42°C, while no growth was observed below 30°C  
296 or at 45°C. Growth occurred at pH values from 6.0 to 8.5, with optimum growth between 6.5 and  
297 7.0. The strain tolerated salt concentrations up to 2% (w/v) NaCl and bile up to 0.3%. The cells  
298 were catalase-negative. The physiological and biochemical comparison of strain AF73-05CM02<sup>T</sup>  
299 and related strain was carried out using API 20A, API 50CHL and API ZYM tests, the result were  
300 summarized in the species description and the differences of selected characteristics with the  
301 reference strain are given in **Table 4**. All the results of enzymatic characteristics and carbon source  
302 assimilation from API ZYM, API 20A and API 50CHL test are presented in **Supplementary**  
303 **Table S3** and **Supplementary Table S4**.

304

305 **Table 4. Comparison of phenotypic features between strain *C. intestinihominis***

306 **AF73-05CM02<sup>T</sup> and the closest related reference strain, *C. minuta* DSM 22607<sup>T</sup>.**

| <b>Phenotypic features</b>                | <b>1*</b>     | <b>2<sup>#</sup></b> |
|-------------------------------------------|---------------|----------------------|
| <b>Cell size (µm)</b>                     | 1.0×1.0–2.0   | 0.4×0.8–1.9          |
| <b>Growth:</b>                            |               |                      |
| Temperature range (optimum) (°C)          | 30–42 (37–42) | 25–45 (37)           |
| pH range (optimum)                        | 6.0–8.5 (7.0) | 6.0–9.0 (7.5)        |
| Salt tolerance (%)                        | 2             | 3                    |
| Bile tolerance (%)                        | 0.3           | 20                   |
| <b>Aesculin hydrolysis</b>                | +             | –                    |
| <b>Acid from (API 20A and API 50CHL):</b> |               |                      |
| Arbutin                                   | +             | w                    |
| D-Galactose                               | +             | w                    |
| D-Maltose                                 | +             | w (– <sup>#</sup> )  |
| D-Sorbitol                                | +             | w (– <sup>#</sup> )  |
| D-Sucrose                                 | +             | –                    |
| D-Turanose                                | +             | –                    |
| Gentiobiose                               | +             | –                    |
| L-Sorbose                                 | +             | w                    |
| Xylitol                                   | +             | w                    |
| D-Adonitol                                | –             | w                    |
| L-Fucose                                  | –             | +                    |
| D-Melezitose                              | w             | –                    |
| D-Raffinose                               | w             | –                    |
| <b>Enzyme activity (API ZYM):</b>         |               |                      |
| β-Glucosidase                             | –             | +                    |

307 Strains: 1, *C. intestinihominis* sp. nov. AF73-05CM02<sup>T</sup>, 2, *C. minuta* DSM 22607<sup>T</sup>.

308 +, Positive; w, weakly positive reaction; –, negative; ND, no data available.

309 \*Data from this study.

310 <sup>#</sup> Data from Morotomi, *et al* (Morotomi et al., 2012) and this study.

311

312 Chemotaxonomic characteristics of strain AF73-05CM02<sup>T</sup> were consistent with the results of the



313 reference strain that were performed under identical conditions, confirming that the novel isolate  
 314 belongs to the genus *Christensenella*. The cellular fatty acid composition of strain AF73-05CM02<sup>T</sup>  
 315 and DSM 22607<sup>T</sup> are presented in **Table 5**, and the dominant fatty acids (representing > 5% of the  
 316 total) for strain AF73-05CM02<sup>T</sup> were C<sub>10:0</sub> (7.5%), iso-C<sub>11:0</sub> (5.6%), C<sub>12:0</sub> (7.2%), C<sub>14:0</sub> (46.6%),  
 317 iso-C<sub>15:0</sub> (7.4%), C<sub>16:0</sub> (9.7%) and C<sub>18:1 ω9c</sub> (6.9%). The higher amount of C<sub>14:0</sub> and less amount of  
 318 iso-C<sub>15:0</sub> and C<sub>16:0</sub> significantly differentiated strain AF73-05CM02<sup>T</sup> from the reference strains.  
 319 The cell-wall diamino acid was LL-diaminopimelic acid.  
 320  
 321 **Table 5. Cellular fatty acid composition of strain AF73-05CM02<sup>T</sup> and closely related species,**  
 322 **DSM 22607<sup>T</sup>.** Strains: 1, AF73-05CM02<sup>T</sup>; 2, *C. minuta* DSM 22607<sup>T</sup>; Data were obtained in this  
 323 study. Numbers represent percentages of the total fatty acids. Only fatty acids amounting 1% or  
 324 higher are shown. t, traces (<1%).

| <b>Fatty acids</b>                                    | <b>1</b>    | <b>2</b>    |
|-------------------------------------------------------|-------------|-------------|
| <b>C<sub>10:0</sub></b>                               | <b>7.5</b>  | <b>8.6</b>  |
| <b>C<sub>12:0</sub></b>                               | <b>7.2</b>  | 1.1         |
| <b>C<sub>14:0</sub></b>                               | <b>46.6</b> | <b>13.0</b> |
| <b>C<sub>14:0</sub> 2OH</b>                           | t           | 1.3         |
| <b>C<sub>16:0</sub></b>                               | <b>9.7</b>  | <b>21.1</b> |
| <b>C<sub>18:1 ω9c</sub></b>                           | <b>6.9</b>  | <b>6.8</b>  |
| <b>C<sub>18:1 ω7c</sub></b>                           | t           | 3.9         |
| <b>C<sub>18:0</sub></b>                               | 1.8         | 3.7         |
| <b>Iso-C<sub>11:0</sub></b>                           | <b>5.6</b>  | 2.9         |
| <b>Iso-C<sub>15:0</sub></b>                           | <b>7.4</b>  | <b>27.4</b> |
| <b>Anteiso-C<sub>11:0</sub></b>                       | t           | 1.3         |
| <b>Anteiso-C<sub>13:0</sub></b>                       | t           | 2.4         |
| <b>Anteiso-C<sub>15:0</sub></b>                       | 1.3         | 3.2         |
| <b>Iso-C<sub>17:1</sub> /anteiso B</b>                | 4.7         | 1.7         |
| <b>Antei-C<sub>18:0</sub> /C<sub>18:2 ω6,9c</sub></b> | t           | 1.7         |

325

326 For Susceptibility tests, strain AF73-05CM02<sup>T</sup> was resistant to oxacillin and compound  
327 sulfamethoxazole, but sensitive to penicillin, ampicillin, carbenicillin, piperacillin, vancomycin,  
328 polymyxin B, furazolidone, chloroamphenicol and clindamycin (**Supplementary Table S5**). The  
329 hemolytic activity of the cells was not founded.

330 Metabolic end products from glucose for strain AF73-05CM02<sup>T</sup> and DSM 22607<sup>T</sup> are shown in  
331 **Supplementary Table 6**. Acetic acid, formic acid, butyric acid and lactic acid were the major end  
332 products (>1 mmol/L) for strain AF73-05CM02<sup>T</sup>.

333

334 We found strain AF73-05CM02<sup>T</sup> can be clearly differentiated from *C. minuta* DSM 22607<sup>T</sup> based  
335 on a lot of phenotypic and genotypic characteristics and ANI values obtained in this study can  
336 separate this isolate from related species, which suggest that the strain AF73-05CM02<sup>T</sup> represents  
337 a novel species of the genus *Christensenella*. Therefore, we propose AF73-05CM02<sup>T</sup> (=CGMCC  
338 1.5207<sup>T</sup> =DSM 103477<sup>T</sup>) as the type strain of *Christensenella intestinhominis* sp. nov.

339

## 340 **EPS production**

341 EPS produced by probiotics have several biologically beneficial functions on the host, such as  
342 improve the viscosity of the lactic acid bacteria fermented product (Li et al., 2014) and have  
343 significant roles on colonization, stress resistance and adhesion (Delcour et al., 1999).  
344 Furthermore, it has been suggested EPS may have probiotics properties on immune modulation  
345 and antioxidative effects (Welman and Maddox, 2003; Fanning et al., 2012). In the present  
346 research, both test strains, *C. intestinhominis* AF73-05CM02<sup>T</sup> and *C. minuta* DSM 22607<sup>T</sup>, were

347 capable of producing EPS with amount of 234 and 271 mg/L, respectively.

348

### 349 **Removal of Cholesterol**

350 The test the cholesterol-lowering activity was determined in PYG-CHO broth added with bile.

351 Both strain AF73-05CM02<sup>T</sup> and *C. minuta* DSM 22607<sup>T</sup> showed a capacity for removing

352 cholesterol from PYG-CHO broth. After incubated in PYG-CHO at 37°C for 4 days, the amount

353 of cholesterol in medium were reduced with efficiency of 36.6% and 54.3% by AF73-05CM02<sup>T</sup>

354 and *C. minuta* DSM 22607<sup>T</sup>, respectively. The control sample, containing no cultures,

355 demonstrated no cholesterol removal, as expected. The mechanisms of cholesterol-lowering by

356 probiotics from *in vitro* experiments have been reported including many hypotheses, such as

357 deconjugated bile acids via bile salt hydrolase activity, adsorption to cellular surface and

358 conversion by probiotics (Ishimwe et al., 2015). In the previous study, *in vivo* experiment of

359 cholesterol-lowering showed the probiotics have a useful and safe effect on modulating the

360 serum-lipid profile and reducing the host cholesterol level (Pan et al., 2010). A high cholesterol

361 level as a main production of obesity can increase the risk of CVDs. The genus *Christensenella* as

362 a especially common microorganism has been founded in lean people and showed a high

363 abundance population in the gut (Goodrich et al., 2014), suggesting *Christensenella* has a potential

364 function in protecting against obesity. Further studies will be required to focus on the cholesterol

365 reducing properties *in vitro* and *in vivo* and reveal the mechanism of lose weight for genus

366 *Christensenella*.

367

### 368 **Description of *Christensenella intestinhominis* sp. nov.**

369 *Christensenella intestinhominis* (in.tes.ti.ni.ho'mi.nis. L. gen. n. *intestini* of the intestine; L. gen. n.  
370 *hominis* of a human being; N.L. gen. n. *intestinhominis* of the human intestine).

371 Cells are Gram-stain-negative, obligately anaerobic, non-motile and short rods (1.0×1.0–2.0µm)  
372 isolated from a faecal sample collected from a healthy adult. Colonies on PYG agar are 0.2mm in  
373 diameter and punctiform with circular and beige after 4 days of growth at 37°C. Growth occurs at  
374 temperatures from 30-42°C, with the optimum around 37-42°C. The pH range is from 6.0 to 8.5,  
375 with optimum between 6.5 and 7.0. Able to grow in the presence of up to 2.0% (w/v) NaCl and  
376 0.3% bile (w/v). Major end products of metabolism of glucose are Acetic acid, formic acid, butyric  
377 acid and lactic acid. The cells exhibit resistance to oxacillin and compound sulfamethoxazole, but  
378 are sensitive to penicillin, ampicillin, carbenicillin, piperacillin, vancomycin, polymyxin B,  
379 furazolidone, chloroamphenicol, and clindamycin. The predominant cellular fatty acids are C<sub>10:0</sub>,  
380 iso-C<sub>11:0</sub>, C<sub>12:0</sub>, C<sub>14:0</sub>, iso-C<sub>15:0</sub>, C<sub>16:0</sub> and C<sub>18:1 ω9c</sub>. The diagnostic cell-wall diamino acid is  
381 LL-diaminopimelic acid.

382 In API 20A and API 50CHL, the isolate was positive for utilization arbutin, D-arabinose,  
383 D-fructose, D-fucose, D-galactose, D-glucose, D-lyxose, D-ribose, D-sorbitol, D-sucrose, D-tagatose,  
384 D-turanose, D-xylose, gentiobiose, L-arabinose, L-rhamnose, L-sorbose,  
385 methyl-β-D-xylopyranoside, salicin and xylitol, weakly reactions for D-maltose, D-mannose,  
386 D-melezitose, D-raffinose, erythritol, L-xylose and salicin, and negative for amygdalin, cellobiose,  
387 D-adonitol, D-arabitol, D-lactose, D-mannitol, D-melibiose, D-trehalose, dulcitol, gluconate,  
388 glycerol, glycogen, inositol, inulin, L-arabitol, L-fucose, methyl-D-glucopyranoside,  
389 methyl-α-D-mannopyranoside, N-acetyl-glucosamine, 2-ketogluconate and 5-ketogluconate.

390 Indole is not formed. Esculin can be degraded, but gelatin is not hydrolysed. Catalase is negative.

391 Results obtained from API ZYM showed positive enzymatic activity for  
392 naphthol-AS-BI-phosphohydrolase and negative for alkaline phosphatase, esterase (C4), esterase  
393 lipase (C8), lipase (C14), leucine arylamidase, valine arylamidase, cystine arylamidase, trypsin,  
394  $\alpha$ -chymotrypsin, acid phosphatase,  $\alpha$ -galactosidase,  $\beta$ -galactosidase,  $\beta$ -glucuronidase,  
395  $\alpha$ -glucosidase,  $\beta$ -glucosidase, *N*-acetyl- $\beta$ -glucosaminidase,  $\alpha$ -mannosidase and  $\beta$ -fucosidase.

396 In the result of RAST annotation, 11 genes/proteins are associated with biosynthesis of DAP,  
397 including 4-hydroxy-tetrahydrodipicolinate reductase (EC 1.17.1.8),  
398 4-hydroxy-tetrahydrodipicolinate synthase (EC 4.3.3.7), aspartate-semialdehyde dehydrogenase  
399 (EC 1.2.1.11), aspartokinase (EC 2.7.2.4), diaminopimelate decarboxylase (EC 4.1.1.20),  
400 diaminopimelate epimerase (EC 5.1.1.7), L, L-diaminopimelate aminotransferase (EC 2.6.1.83),  
401 *N*-acetyl-L, L-diaminopimelate deacetylase (EC 3.5.1.47), *N*-succinyl-L, L-diaminopimelate  
402 desuccinylase (EC 3.5.1.18), UDP-*N*-acetylmuramoylalanyl-D-glutamate-2, 6-diaminopimelate  
403 ligase (EC 6.3.2.13) and UDP-*N*-acetylmuramoylalanyl-D-glutamyl-2,  
404 6-diaminopimelate-D-alanyl-D-alanine ligase (EC 6.3.2.10). 31 genes/proteins are associated with  
405 biosynthesis of polar lipids, including 1-acyl-sn-glycerol-3-phosphate acyltransferase (EC  
406 2.3.1.51), acyl carrier protein (4 copies), acyl-phosphate:glycerol-3-phosphate O-acyltransferase  
407 PlsY, alcohol dehydrogenase (EC 1.1.1.1) (8 copies), acetaldehyde dehydrogenase (EC 1.2.1.10)  
408 (2 copies), aldehyde dehydrogenase (EC 1.2.1.3), aldehyde dehydrogenase B (EC 1.2.1.22),  
409 cardiolipin synthetase (EC 2.7.8.-), CDP-diacylglycerol-glycerol-3-phosphate  
410 3-phosphatidyltransferase (EC 2.7.8.5), diacylglycerol kinase (EC 2.7.1.107), dihydroxyacetone  
411 kinase family protein, glycerate kinase (EC 2.7.1.31), glycerol kinase (EC 2.7.1.30) (2 copies),  
412 glycerol-1-phosphate dehydrogenase [NAD(P)] (EC 1.1.1.261) (2 copies), glycerol-3-phosphate

413 dehydrogenase (EC 1.1.5.3), glycerol-3-phosphate dehydrogenase [NAD(P)<sup>+</sup>] (EC 1.1.1.94),  
414 phosphate:acyl-ACP acyltransferase PlsX and phosphatidate cytidyltransferase (EC 2.7.7.41). 14  
415 genes/proteins are associated with biosynthesis of polyamines, including agmatine deiminase (EC  
416 3.5.3.12), agmatine/putrescine antiporter, associated with agmatine catabolism (2 copies), arginine  
417 decarboxylase (EC 4.1.1.19) / Lysine decarboxylase (EC 4.1.1.18), carbamate kinase (EC 2.7.2.2),  
418 carboxynorspermidine dehydrogenase, putative (EC 1.1.1.-), putrescine carbamoyltransferase (EC  
419 2.1.3.6), putrescine transport ATP-binding protein PotA (TC 3.A.1.11.1), S-adenosylmethionine  
420 decarboxylase proenzyme (EC 4.1.1.50), prokaryotic class 1A and spermidine putrescine ABC  
421 transporter permease component PotB (TC 3.A.1.11.1), spermidine putrescine ABC transporter  
422 permease component potC (TC\_3.A.1.11.1) (2 copies), spermidine synthase (EC 2.5.1.16) and  
423 transcriptional regulator, MerR family, near polyamine transporter. 4 genes/proteins are associated  
424 with biosynthesis of teichoic and lipoteichoic acids, including 2-C-methyl-D-erythritol  
425 4-phosphate cytidyltransferase (EC 2.7.7.60), teichoic acid export ATP-binding protein TagH  
426 (EC 3.6.3.40), teichoic acid translocation permease protein TagG and undecaprenyl-phosphate  
427 *N*-acetylglucosaminyl 1-phosphate transferase (EC 2.7.8.-). 3 genes/proteins are associated with  
428 biosynthesis of lipopolysaccharides, including lipopolysaccharide biosynthesis protein RffA (2  
429 copies), lipopolysaccharide cholinephosphotransferase LicD1 (EC 2.7.8.-) and HtrA  
430 protease/chaperone protein. There are no genes responsible for biosynthesis of respiratory  
431 lipoquinones or mycolic acids.

432 The type strain AF73-05CM02<sup>T</sup> (=CGMCC 1.5207<sup>T</sup> =DSM 103477<sup>T</sup>) was isolated from the faecal  
433 samples of a healthy adult residing in Shenzhen, China (37°35'37"N, 114°15'32"E). The DNA  
434 G+C content of strain AF73-05CM02<sup>T</sup> is 52.07 mol% calculated from the genome sequence. The

435 genome size is 3.02Mbp.

436

## 437 **Data Availability Statement**

438 The GenBank/EMBL/DDBJ accession number for the 16S rRNA gene sequence of  
439 *Christensenella intestinhominis* AF73-05CM02<sup>T</sup> are KX078376. The draft genome of *C.*  
440 *intestinhominis* AF73-05CM02<sup>T</sup> have been deposited at DDBJ/EMBL/GenBank under the  
441 accession numbers MAIQ00000000. The data that support the findings of this study have also  
442 been deposited into CNGB Sequence Archive (CNSA) (Guo et al., 2020) of China National  
443 GeneBank DataBase (CNGBdb) (Chen et al., 2020) with accession number CNPhis0003415.

444

## 445 **Author Contributions**

446 Conceived and designed the experiments: Y.Z. and L.X. Performed the experiments: Y.Z., W.X.,  
447 M.L. and Y.D. Analyzed the data: Y.Z., L.X., G.L., and X.L. Contributed  
448 reagents/materials/analysis tools: Y.Z., W.X., M.L. and Y.D. Wrote the paper: YZ.

449

## 450 **Funding**

451 This work was supported by grants from National Key Research and Development Program of  
452 China (No. 2018YFC1313800) and Natural Science Foundation of Guangdong Province, China  
453 (No. 2019B020230001).

454

## 455 **Acknowledgements**

456 We thank the colleagues at BGI-Shenzhen for sample collection, and discussions, and China

457 National Genebank (CNGB) Shenzhen for DNA extraction, library construction, sequencing.

458

## 459 Reference

- 460 Aziz, R.K., Bartels, D., Best, A.A., DeJongh, M., Disz, T., Edwards, R.A., et al. (2008). The RAST  
461 Server: rapid annotations using subsystems technology. *BMC Genomics* 9, 75. doi:  
462 10.1186/1471-2164-9-75.
- 463 Bäckhed F, L.R., Sonnenburg JL, Peterson DA, Gordon JI. (2005). Host-Bacterial Mutualism in the  
464 Human Intestine. *Science* 307(5717), 1915-1920. doi: 10.1126/science.1104816.
- 465 Benson, A.K., Kelly, S.A., Legge, R., Ma, F., Low, S.J., Kim, J., et al. (2010). Individuality in gut  
466 microbiota composition is a complex polygenic trait shaped by multiple environmental and  
467 host genetic factors. *Proc Natl Acad Sci U S A* 107(44), 18933-18938. doi:  
468 10.1073/pnas.1007028107.
- 469 Chen, F.Z., You, L.J., Yang, F., Wang, L.N., Guo, X.Q., Gao, F., et al. (2020). CNGBdb: China National  
470 GeneBank DataBase. *Yi Chuan* 42(8), 799-809. doi: 10.16288/j.ycz.20-080.
- 471 Chen, S., and Dong, X. (2004). *Acetanaerobacterium elongatum* gen. nov., sp. nov., from paper mill  
472 waste water. *Int J Syst Evol Microbiol* 54(Pt 6), 2257-2262. doi: 10.1099/ijs.0.63212-0.
- 473 Cheng, H.R., and Jiang, N. (2006). Extremely rapid extraction of DNA from bacteria and yeasts.  
474 *Biotechnol Lett* 28(1), 55-59. doi: 10.1007/s10529-005-4688-z.
- 475 Coil, D.A., Jospin, G., and Eisen, J.A. (2020). Draft Genome Analysis of *Christensenella minuta* DSM  
476 22607, exhibiting an unusual expansion of transporter homologs of unknown function. *J*  
477 *Genomics* 8, 25-29. doi: 10.7150/jgen.43162.
- 478 Damodharan, K., Lee, Y.S., Palaniyandi, S.A., Yang, S.H., and Suh, J.W. (2015). Preliminary probiotic  
479 and technological characterization of *Pediococcus pentosaceus* strain KID7 and in vivo  
480 assessment of its cholesterol-lowering activity. *Front Microbiol* 6, 768. doi:  
481 10.3389/fmicb.2015.00768.
- 482 Delcour, J., Ferain, T., Deghorain, M., Palumbo, E., and Hols, P. (1999). The biosynthesis and  
483 functionality of the cell-wall of lactic acid bacteria. *Antonie Van Leeuwenhoek* 76(1-4),  
484 159-184.
- 485 Dubois, M., Gilles, K. A., Hamilton, J. K., Rebers, P. A., Smith, F. (1956). Colorimetric method for  
486 determination of sugars and related substances. *Analytical Chemistry* 28, 350-356.
- 487 Duran, N., Ozer, B., Duran, G.G., Onlen, Y., and Demir, C. (2012). Antibiotic resistance genes &  
488 susceptibility patterns in staphylococci. *Indian J Med Res* 135, 389-396.
- 489 Fan, P., Bian, B., Teng, L., Nelson, C.D., Driver, J., Elzo, M.A., et al. (2020). Host genetic effects upon  
490 the early gut microbiota in a bovine model with graduated spectrum of genetic variation. *ISME*  
491 *J* 14(1), 302-317. doi: 10.1038/s41396-019-0529-2.
- 492 Fanning, S., Hall, L.J., Cronin, M., Zomer, A., MacSharry, J., Goulding, D., et al. (2012).  
493 Bifidobacterial surface-exopolysaccharide facilitates commensal-host interaction through  
494 immune modulation and pathogen protection. *Proc Natl Acad Sci U S A* 109(6), 2108-2113.  
495 doi: 10.1073/pnas.1115621109.
- 496 Felsenstein, J. (1981). Evolutionary trees from DNA sequences: a maximum likelihood approach. *J*



- 497 *Mol Evol* 17(6), 368-376.
- 498 Fujimura, K.E., Slusher, N.A., Cabana, M.D., and Lynch, S.V. (2010). Role of the gut microbiota in  
499 defining human health. *Expert Rev Anti Infect Ther* 8(4), 435-454. doi: 10.1586/eri.10.14.
- 500 Galperin, M.Y., Makarova, K.S., Wolf, Y.I., and Koonin, E.V. (2015). Expanded microbial genome  
501 coverage and improved protein family annotation in the COG database. *Nucleic Acids Res*  
502 43(Database issue), D261-269. doi: 10.1093/nar/gku1223.
- 503 Ghosh, A.R. (2013). Appraisal of microbial evolution to commensalism and pathogenicity in humans.  
504 *Clin Med Insights Gastroenterol* 6, 1-12. doi: 10.4137/CGast.S11858.
- 505 Gilliland, S.E., Nelson, C.R., and Maxwell, C. (1985). Assimilation of cholesterol by *Lactobacillus*  
506 *acidophilus*. *Appl Environ Microbiol* 49(2), 377-381.
- 507 Goodrich, J.K., Waters, J.L., Poole, A.C., Sutter, J.L., Koren, O., Blekhan, R., et al. (2014). Human  
508 genetics shape the gut microbiome. *Cell* 159(4), 789-799. doi: 10.1016/j.cell.2014.09.053.
- 509 Goris, J., Konstantinidis, K.T., Klappenbach, J.A., Coenye, T., Vandamme, P., and Tiedje, J.M. (2007).  
510 DNA-DNA hybridization values and their relationship to whole-genome sequence similarities.  
511 *Int J Syst Evol Microbiol* 57(Pt 1), 81-91. doi: 10.1099/ijs.0.64483-0.
- 512 Grant, J.R., and Stothard, P. (2008). The CGView Server: a comparative genomics tool for circular  
513 genomes. *Nucleic Acids Res* 36(Web Server issue), W181-184. doi: 10.1093/nar/gkn179.
- 514 Guo, X., Chen, F., Gao, F., Li, L., Liu, K., You, L., et al. (2020). CNSA: a data repository for archiving  
515 omics data. *Database (Oxford)* 2020. doi: 10.1093/database/baaa055.
- 516 Hooper, L.V., Littman, D.R., and Macpherson, A.J. (2012). Interactions between the microbiota and the  
517 immune system. *Science* 336(6086), 1268-1273. doi: 10.1126/science.1223490.
- 518 Huang, Y., and Zheng, Y. (2010). The probiotic *Lactobacillus acidophilus* reduces cholesterol  
519 absorption through the down-regulation of Niemann-Pick C1-like 1 in Caco-2 cells. *Br J Nutr*  
520 103(4), 473-478. doi: 10.1017/S0007114509991991.
- 521 Ishimwe, N., Daliri, E.B., Lee, B.H., Fang, F., and Du, G. (2015). The perspective on  
522 cholesterol-lowering mechanisms of probiotics. *Mol Nutr Food Res* 59(1), 94-105. doi:  
523 10.1002/mnfr.201400548.
- 524 Jeffery, I.B., Lynch, D.B., and O'Toole, P.W. (2016). Composition and temporal stability of the gut  
525 microbiota in older persons. *ISME J* 10(1), 170-182. doi: 10.1038/ismej.2015.88.
- 526 Kanehisa, M., Sato, Y., Kawashima, M., Furumichi, M., and Tanabe, M. (2016). KEGG as a reference  
527 resource for gene and protein annotation. *Nucleic Acids Res* 44(D1), D457-462. doi:  
528 10.1093/nar/gkv1070.
- 529 Khachatryan, Z.A., Ktsoyan, Z.A., Manukyan, G.P., Kelly, D., Ghazaryan, K.A., and Aminov, R.I.  
530 (2008). Predominant role of host genetics in controlling the composition of gut microbiota.  
531 *PLoS One* 3(8), e3064. doi: 10.1371/journal.pone.0003064.
- 532 Kim, M., Oh, H.S., Park, S.C., and Chun, J. (2014). Towards a taxonomic coherence between average  
533 nucleotide identity and 16S rRNA gene sequence similarity for species demarcation of  
534 prokaryotes. *Int J Syst Evol Microbiol* 64(Pt 2), 346-351. doi: 10.1099/ijs.0.059774-0.
- 535 Lau, S.K., McNabb, A., Woo, G.K., Hoang, L., Fung, A.M., Chung, L.M., et al. (2007). *Catabacter*  
536 *hongkongensis* gen. nov., sp. nov., isolated from blood cultures of patients from Hong Kong  
537 and Canada. *J Clin Microbiol* 45(2), 395-401. doi: 10.1128/JCM.01831-06.
- 538 Lau, S.K., Teng, J.L., Huang, Y., Curreem, S.O., Tsui, S.K., and Woo, P.C. (2015). Draft Genome  
539 Sequence of *Catabacter hongkongensis* Type Strain HKU16T, Isolated from a Patient with  
540 Bacteremia and Intestinal Obstruction. *Genome Announc* 3(3). doi:

- 541 10.1128/genomeA.00531-15.
- 542 Li, W., Ji, J., Chen, X., Jiang, M., Rui, X., and Dong, M. (2014). Structural elucidation and antioxidant  
543 activities of exopolysaccharides from *Lactobacillus helveticus* MB2-1. *Carbohydr Polym* 102,  
544 351-359. doi: 10.1016/j.carbpol.2013.11.053.
- 545 Luo, R., Liu, B., Xie, Y., Li, Z., Huang, W., Yuan, J., et al. (2012). SOAPdenovo2: an empirically  
546 improved memory-efficient short-read de novo assembler. *Gigascience* 1(1), 18. doi:  
547 10.1186/2047-217X-1-18.
- 548 Lye, H.-S., Rahmat-Ali, G.R., and Liong, M.-T. (2010a). Mechanisms of cholesterol removal by  
549 lactobacilli under conditions that mimic the human gastrointestinal tract. *International Dairy*  
550 *Journal* 20(3), 169-175. doi: 10.1016/j.idairyj.2009.10.003.
- 551 Lye, H.S., Rusul, G., and Liong, M.T. (2010b). Removal of cholesterol by lactobacilli via incorporation  
552 and conversion to coprostanol. *J Dairy Sci* 93(4), 1383-1392. doi: 10.3168/jds.2009-2574.
- 553 M, S. (1990). *Identification of bacteria by gas chromatography of cellular fatty acids, MIDI technical*  
554 *note 101. MIDI Inc, Newark, DE.*
- 555 Mercan, E., Ispirli, H., Sert, D., Yilmaz, M.T., and Dertli, E. (2015). Impact of exopolysaccharide  
556 production on functional properties of some *Lactobacillus salivarius* strains. *Arch Microbiol*  
557 197(9), 1041-1049. doi: 10.1007/s00203-015-1141-0.
- 558 Morotomi, M., Nagai, F., and Watanabe, Y. (2012). Description of *Christensenella minuta* gen. nov., sp.  
559 nov., isolated from human faeces, which forms a distinct branch in the order *Clostridiales*, and  
560 proposal of *Christensenellaceae* fam. nov. *Int J Syst Evol Microbiol* 62(Pt 1), 144-149. doi:  
561 10.1099/ijs.0.026989-0.
- 562 Ndongo, S., Dubourg, G., Khelaifia, S., Fournier, P.E., and Raoult, D. (2016a). *Christensenella*  
563 *timonensis*, a new bacterial species isolated from the human gut. *New Microbes New Infect* 13,  
564 32-33. doi: 10.1016/j.nmni.2016.05.010.
- 565 Ndongo, S., Khelaifia, S., Fournier, P.E., and Raoult, D. (2016b). *Christensenella massiliensis*, a new  
566 bacterial species isolated from the human gut. *New Microbes New Infect* 12, 69-70. doi:  
567 10.1016/j.nmni.2016.04.014.
- 568 Palmer, C., Bik, E.M., DiGiulio, D.B., Relman, D.A., and Brown, P.O. (2007). Development of the  
569 human infant intestinal microbiota. *PLoS Biol* 5(7), e177. doi: 10.1371/journal.pbio.0050177.
- 570 Pan, D.D., Zeng, X.Q., and Yan, Y.T. (2010). Characterisation of *Lactobacillus fermentum* SM-7  
571 isolated from koumiss, a potential probiotic bacterium with cholesterol-lowering effects. *J Sci*  
572 *Food Agric* 91(3), 512-518. doi: 10.1002/jsfa.4214.
- 573 Pineiro, M., and Stanton, C. (2007). Probiotic bacteria: legislative framework-- requirements to  
574 evidence basis. *J Nutr* 137(3 Suppl 2), 850S-853S.
- 575 Rosa, B.A., Hallsworth-Pepin, K., Martin, J., Wollam, A., and Mitreva, M. (2017). Genome Sequence  
576 of *Christensenella minuta* DSM 22607<sup>T</sup>. *Genome Announc* 5(2). doi:  
577 10.1128/genomeA.01451-16.
- 578 Rudel, L.L., Morris, M. D. (1973). Determination of cholesterol using O-phthalaldehyde. *J Lipid Res*  
579 14(3), 364-366.
- 580 Rzhetsky, A., and Nei, M. (1993). Theoretical foundation of the minimum-evolution method of  
581 phylogenetic inference. *Mol Biol Evol* 10(5), 1073-1095.
- 582 Saitou, N., and Nei, M. (1987). The neighbor-joining method: a new method for reconstructing  
583 phylogenetic trees. *Mol Biol Evol* 4(4), 406-425.
- 584 Smibert RM, K.N. (1994). *Phenotypic Characterization. Methods for General and Molecular*

- 585 Bacteriology: American Society for Microbiology.
- 586 Sorokin, D.Y. (2005). Is there a limit for high-pH life? *Int J Syst Evol Microbiol* 55(Pt 4), 1405-1406.
- 587 doi: 10.1099/ijs.0.63737-0.
- 588 Tamura, K., Peterson, D., Peterson, N., Stecher, G., Nei, M., and Kumar, S. (2011). MEGA5: molecular
- 589 evolutionary genetics analysis using maximum likelihood, evolutionary distance, and
- 590 maximum parsimony methods. *Mol Biol Evol* 28(10), 2731-2739. doi:
- 591 10.1093/molbev/msr121.
- 592 Thompson, J.D., Higgins, D.G., and Gibson, T.J. (1994). CLUSTAL W: improving the sensitivity of
- 593 progressive multiple sequence alignment through sequence weighting, position-specific gap
- 594 penalties and weight matrix choice. *Nucleic Acids Res* 22(22), 4673-4680.
- 595 Tindall, B.J., Rossello-Mora, R., Busse, H.J., Ludwig, W., and Kampfer, P. (2010). Notes on the
- 596 characterization of prokaryote strains for taxonomic purposes. *Int J Syst Evol Microbiol* 60(Pt
- 597 1), 249-266. doi: 10.1099/ijs.0.016949-0.
- 598 Tittsler RP, S.L. (1936). The Use of Semi-solid Agar for the Detection of Bacterial Motility. *J Bacteriol.*
- 599 31(6), 6.
- 600 Tok, E., and Aslim, B. (2010). Cholesterol removal by some lactic acid bacteria that can be used as
- 601 probiotic. *Microbiology and Immunology*. doi: 10.1111/j.1348-0421.2010.00219.x.
- 602 Tremaroli, V., and Backhed, F. (2012). Functional interactions between the gut microbiota and host
- 603 metabolism. *Nature* 489(7415), 242-249. doi: 10.1038/nature11552.
- 604 Tsai, C.C., Lin, P.P., Hsieh, Y.M., Zhang, Z.Y., Wu, H.C., and Huang, C.C. (2014).
- 605 Cholesterol-lowering potentials of lactic acid bacteria based on bile-salt hydrolase activity and
- 606 effect of potent strains on cholesterol metabolism in vitro and in vivo. *ScientificWorldJournal*
- 607 2014, 690752. doi: 10.1155/2014/690752.
- 608 Turnbaugh, P.J., Backhed, F., Fulton, L., and Gordon, J.I. (2008). Diet-induced obesity is linked to
- 609 marked but reversible alterations in the mouse distal gut microbiome. *Cell Host Microbe* 3(4),
- 610 213-223. doi: 10.1016/j.chom.2008.02.015.
- 611 Turnbaugh, P.J., Ley, R.E., Mahowald, M.A., Magrini, V., Mardis, E.R., and Gordon, J.I. (2006). An
- 612 obesity-associated gut microbiome with increased capacity for energy harvest. *Nature*
- 613 444(7122), 1027-1031. doi: 10.1038/nature05414.
- 614 Turnbaugh, P.J., Ridaura, V.K., Faith, J.J., Rey, F.E., Knight, R., and Gordon, J.I. (2009). The effect of
- 615 diet on the human gut microbiome: a metagenomic analysis in humanized gnotobiotic mice.
- 616 *Sci Transl Med* 1(6), 6ra14. doi: 10.1126/scitranslmed.3000322.
- 617 Ventura, M. (2009). Microbial diversity in the human intestine and novel insights from metagenomics.
- 618 *Frontiers in Bioscience* Volume(14), 3214. doi: 10.2741/3445.
- 619 Welman, A.D., and Maddox, I.S. (2003). Exopolysaccharides from lactic acid bacteria: perspectives
- 620 and challenges. *Trends Biotechnol* 21(6), 269-274. doi: 10.1016/S0167-7799(03)00107-0.
- 621 Yoon, H.S., Ju, J.H., Kim, H.N., Park, H.J., Ji, Y., Lee, J.E., et al. (2013). Reduction in cholesterol
- 622 absorption in Caco-2 cells through the down-regulation of Niemann-Pick C1-like 1 by the
- 623 putative probiotic strains *Lactobacillus rhamnosus* BFE5264 and *Lactobacillus plantarum*
- 624 NR74 from fermented foods. *Int J Food Sci Nutr* 64(1), 44-52. doi:
- 625 10.3109/09637486.2012.706598.
- 626 Yoon, S.H., Ha, S.M., Kwon, S., Lim, J., Kim, Y., Seo, H., et al. (2017). Introducing EzBioCloud: a
- 627 taxonomically united database of 16S rRNA gene sequences and whole-genome assemblies.
- 628 *Int J Syst Evol Microbiol* 67(5), 1613-1617. doi: 10.1099/ijsem.0.001755.

629 Zou, Y., Liu, F., Fang, C., Wan, D., Yang, R., Su, Q., et al. (2013). *Lactobacillus shenzhenensis* sp. nov.,  
630 isolated from a fermented dairy beverage. *Int J Syst Evol Microbiol* 63(Pt 5), 1817-1823. doi:  
631 10.1099/ijs.0.041111-0.  
632 Zou, Y., Xue, W., Luo, G., Deng, Z., Qin, P., Guo, R., et al. (2019). 1,520 reference genomes from  
633 cultivated human gut bacteria enable functional microbiome analyses. *Nat Biotechnol* 37(2),  
634 179-185. doi: 10.1038/s41587-018-0008-8.

635

636

637

638

639

640

## 641 **Figure legends**

642 **Figure 1. Neighbour-joining phylogenetic tree based on 16S rRNA gene sequences showing**  
643 **the phylogenetic relationships of strains AF73-05CM02<sup>T</sup> and the representatives of related**  
644 **taxa.** *Bacillus subtilis* subsp. *subtilis* NCIB 3610<sup>T</sup> (ABQL01000001) was used as an out-group.  
645 Bootstrap values based on 1000 replications higher than 70% are shown at the branching points.  
646 Bar, substitutions per nucleotide position.

647

648 **Figure 2. Graphical circular map of the genome from strain *Christensenella intestinhominis***  
649 **sp. nov. AF73-05CM02<sup>T</sup>, *Christensenella minuta* DSM 22607<sup>T</sup>, *Catabacter hongkongensis***  
650 **HKU16<sup>T</sup>, *Christensenella massiliensis* Marseille-P2438<sup>T</sup> and *Christensenella timonensis***  
651 **Marseille-P2437<sup>T</sup> using CGView server using default parameters. From inner to outer: Ring 1**

652 and Ring 2, G+C positive skew (green) and G+C negative skew (purple); Ring 3, GC% content;  
653 Ring 4-Ring 8, Contig, rRNA, tmRNA, rRNA and CDS from AF73-05CM02<sup>T</sup>; Ring 9,  
654 *Catabacter hongkongensis* HKU16<sup>T</sup>; Ring 10, *Christensenella timonensis* Marseille-P2437<sup>T</sup>; Ring  
655 11, *Christensenella massiliensis* Marseille-P2438<sup>T</sup>; Ring 12, *Christensenella minuta* DSM 22607<sup>T</sup>.

656

657 **Figure 3. The distribution of the genes associated with the COG functional categories in**  
658 **strain AF73-05CM02<sup>T</sup>.** The number of genes is shown in parentheses.

659

660

661

662

663 **Figure 1**

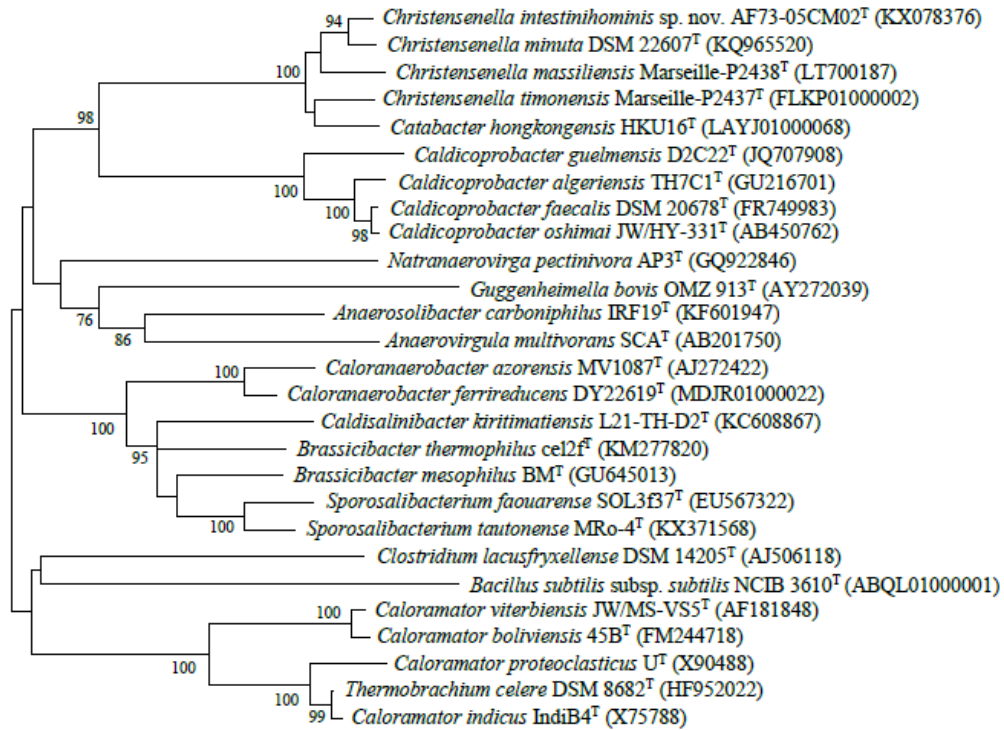

0.020

664

665

666

667

668

669

670

671

672

673

674 **Figure 2**

Length: 3,026,655 bp

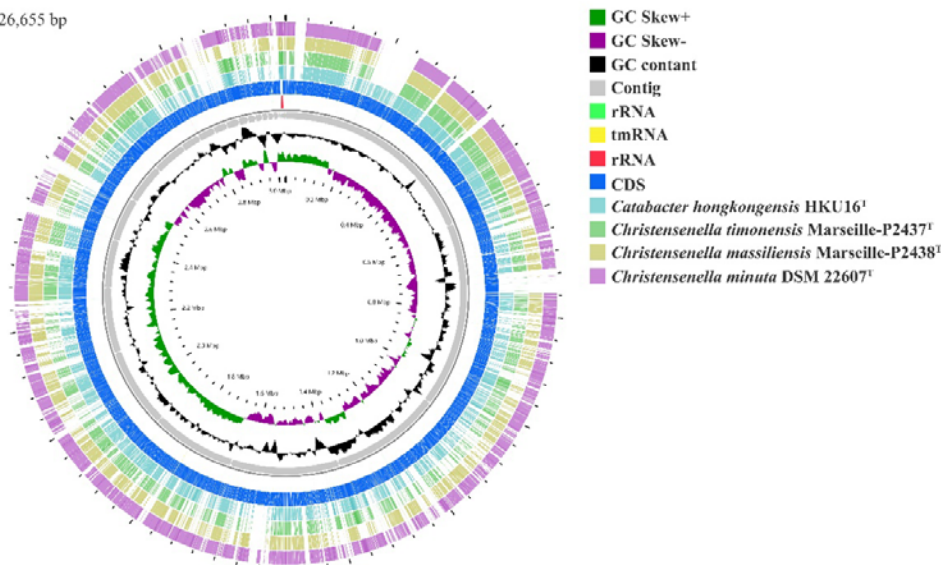

675

676

677

678 **Figure 3**

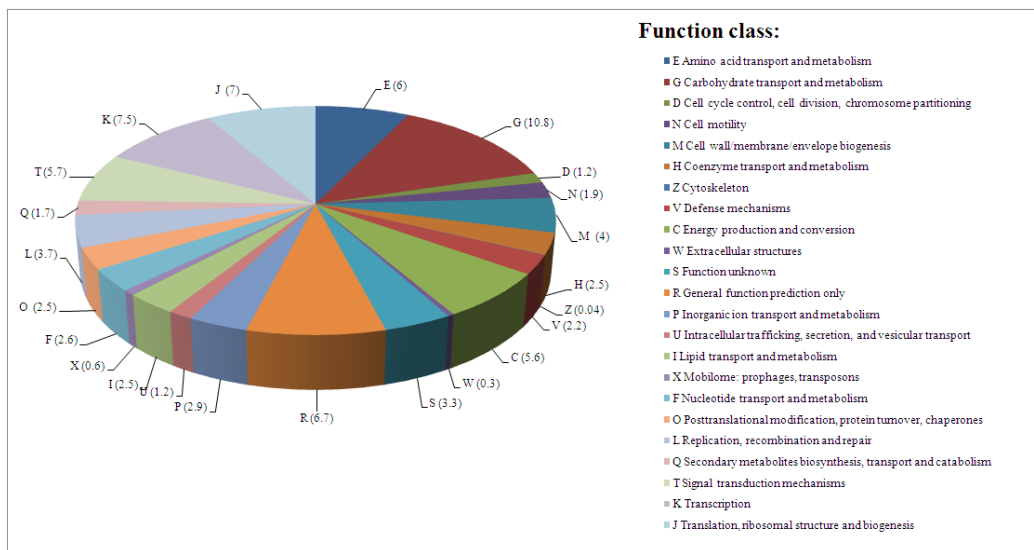

679

680

681

682

683 **Supplementary Material**



684 **Supplementary Table S1. Number of genes associated with general COG functional**  
685 **categories in the genome of *C. intestinhominis* AF73-05CM02<sup>T</sup> and *C. minuta* DSM 22607<sup>T</sup>.**

686 **Supplementary Table S2. The specific genes/protein related to biosynthesis of DAP, polar**  
687 **lipids, polyamines and lipoteichoic and teichoic acids and their positions in the genome in**  
688 **comparasion of strain AF73-05CM02<sup>T</sup> and *C. minuta* DSM 22607<sup>T</sup> identified by Rapid**  
689 **Annotation Subsystem Technology (RAST).**

690 **Supplementary Table S3. Enzymatic characteristics of strain AF73-05CM02<sup>T</sup> from API**  
691 **ZYM test.**

692 **Supplementary Table S4. Carbon source assimilation of strain AF73-05CM02<sup>T</sup> from API**  
693 **20A and API 50CHL test.**

694 **Supplementary Table S5. Antibiotic sensitivity of strain AF73-05CM02<sup>T</sup>.**

695 **Supplementary Table S6. Metabolic end products from glucose for strain AF73-05CM02<sup>T</sup>**  
696 **and *C. minuta* DSM 22607<sup>T</sup>.**

697

698 **Supplementary Figure S1. Maximum-likelihood phylogenetic tree based on 16S rRNA gene**  
699 **sequences showing the phylogenetic relationships of strains AF73-05CM02<sup>T</sup> and the**  
700 **representatives of related taxa. *Bacillus subtilis* subsp. *subtilis* NCIB 3610<sup>T</sup> (ABQL01000001)**  
701 **was used as an out-group. Bootstrap values based on 1000 replications higher than 70% are shown**  
702 **at the branching points. Bar, substitutions per nucleotide position.**

703 **Supplementary Figure S2. Minimum-evolution phylogenetic tree based on 16S rRNA gene**



704 **sequences showing the phylogenetic relationships of strains AF73-05CM02<sup>T</sup> and the**  
705 **representatives of related taxa. *Bacillus subtilis subsp. subtilis* NCIB 3610<sup>T</sup> (ABQL01000001)**  
706 was used as an out-group. Bootstrap values based on 1000 replications higher than 70% are shown  
707 at the branching points. Bar, substitutions per nucleotide position.

708 **Supplementary Figure S3. Certification. Deposit certification of CGMCC.**

709 **Supplementary Figure S4. Certification. Deposit certification of DSMZ.**
